# Supplementary material for: Structure of the catalytically active APOBEC3G bound to a DNA oligonucleotide inhibitor reveals tetrahedral geometry of the transition state
Source: PubMed Central journal article supplement (PMC9675756; doi:10.1038/s41467-022-34752-1), 2022-11-19
Supplement: 41467_2022_34752_MOESM1_ESM.pdf [file 41467_2022_34752_MOESM1_ESM.pdf]

## Supplementary Data:

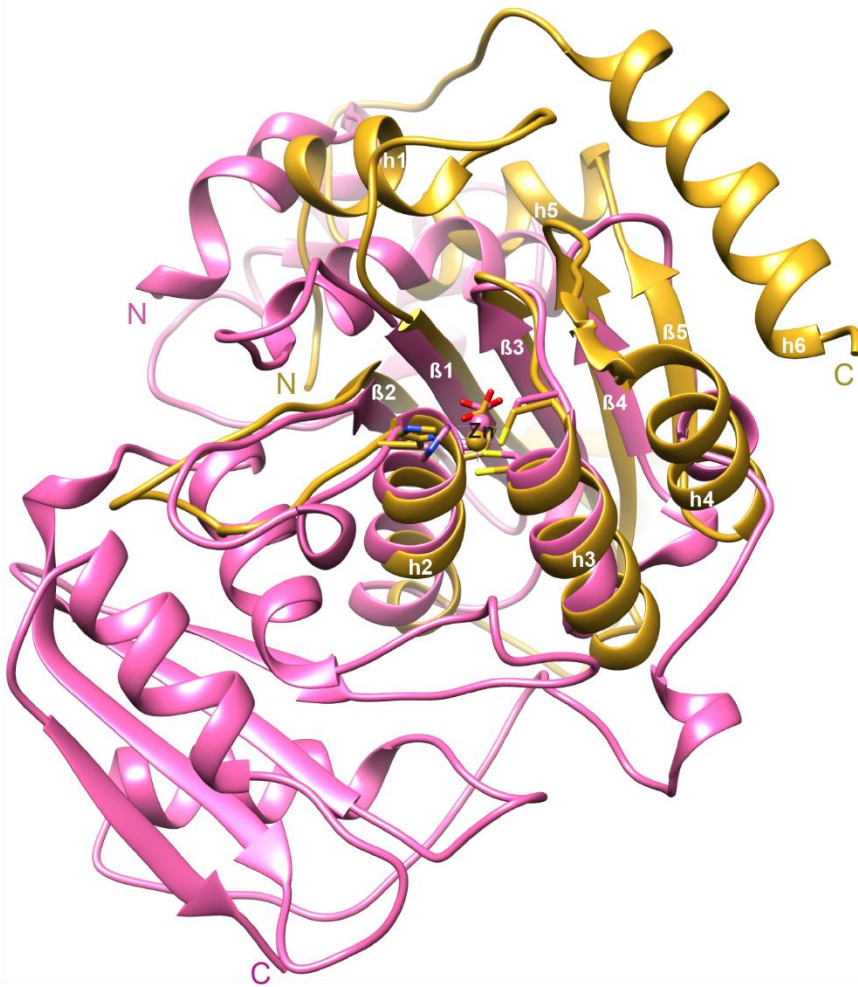

**Supplementary Figure 1a.** Structure alignment of wild-type human A3G-CTD (PDB ID: 4ROV) with *E. coli* CDA (PDB ID: 1CTU) using the program UCSF Chimera. Protein structures are represented as cartoon (A3G-CTD2 is gold and *E. coli* CDA is pink).  $Zn^{2+}$  is shown as a sphere (Orange in A3G-CTD2 and pink in *E. coli* CDA).  $Zn^{2+}$  coordinating residues (H257, C288, C291 in A3G-CTD and H102, C129, C132 in *E. coli* CDA) and catalytic residue (E259 in A3G-CTD and E104 in *E. coli* CDA) are shown as sticks. N and C (colored as corresponding protein's color) indicate the N- and C-terminal ends of the protein. Only A3G-CTD secondary structures are labeled.  $Zn^{2+}$ , Helix 2, Helix 3,  $\beta$ 1,  $\beta$ 2,  $\beta$ 3 and  $\beta$ 4 of A3G-CTD are structurally aligned with *E. coli* CDA.

```

A3G-CTD      187 GSHMASLRHSM-----D-PPT----- 201
E.Coli-CDA   1  -----MHPRFQTAFAQ--LADNLQSALEPILADKYFPALLTGEQ 37

A3G-CTD      202 -----FTFNFNNEPWVRGR----- 219
E.Coli-CDA   38 VSSLKSATGLDEDALAFALLP-----LAAACARTPLSNFNVG 74
                β1                β2                h2
A3G-CTD      220 LCYEVERMHNDTWVL-LNQRGGFLCNQAPHKHGF--L---EGRHAELCFL 263
E.Coli-CDA   75 AIARGV-----SG--TWYFGANMEF-----IGATMQQTVHAEQSAI 108
                h2                β3                h3
A3G-CTD      264 DVVIP-FWKLDLDQDYR--VTCFTSWSPCFSCAQEMAKFISKKNHVS---L 307
E.Coli-CDA  109 SHAWLSGEK-----ALAAITVNYTPCGHCRQFMNEL---N--S-GLDL 145
                β4
A3G-CTD      308 CIFTARIYDDQGRCEG-----LR--TLAEAGAKISIMTYSEFKHC 346
E.Coli-CDA  146 RIHLP-----GREAHALRDYLPDA----- 164

A3G-CTD      347 WDTFVDHQGCPFPQWDGLDEHSQDLSGRLRAILQNQEN----- 384
E.Coli-CDA  165 -----FGPKDLEIKTLL 176

A3G-CTD      384 ----- 384
E.Coli-CDA  177 MDEQDHGYALTGDALSQAIAAANRSHMPYSKSPSGVALECKDGRIFSGS 226

A3G-CTD      384 ----- 384
E.Coli-CDA  227 YAENAAFNPTLPPLQALILLNLKGYDYPDIQRAVLAEKADAPLIQWDAT 276

A3G-CTD      384 ----- 384
E.Coli-CDA  277 SATLKALGCHSIDRVLLA 294

```

**Supplementary Figure 1b.** Structure based sequence alignment of A3G-CTD (PDB ID: 4ROV) with *E. coli* CDA (PDB ID: 1CTU) created by the program UCSF Chimera. Superimposed structures are shown in **Supplemental Fig. 1a**. Structurally aligned sequences (Helix 2, Helix 3, β1, β2, β3 and β4 of A3G-CTD) are highlighted by yellow. Zn<sup>2+</sup> coordinating residues (H257, C288, C291 in A3G-CTD and H102, C129, C132 in *E. coli* CDA) and catalytic residue (E259 in A3G-CTD and E104 in *E. coli* CDA) are highlighted by green.

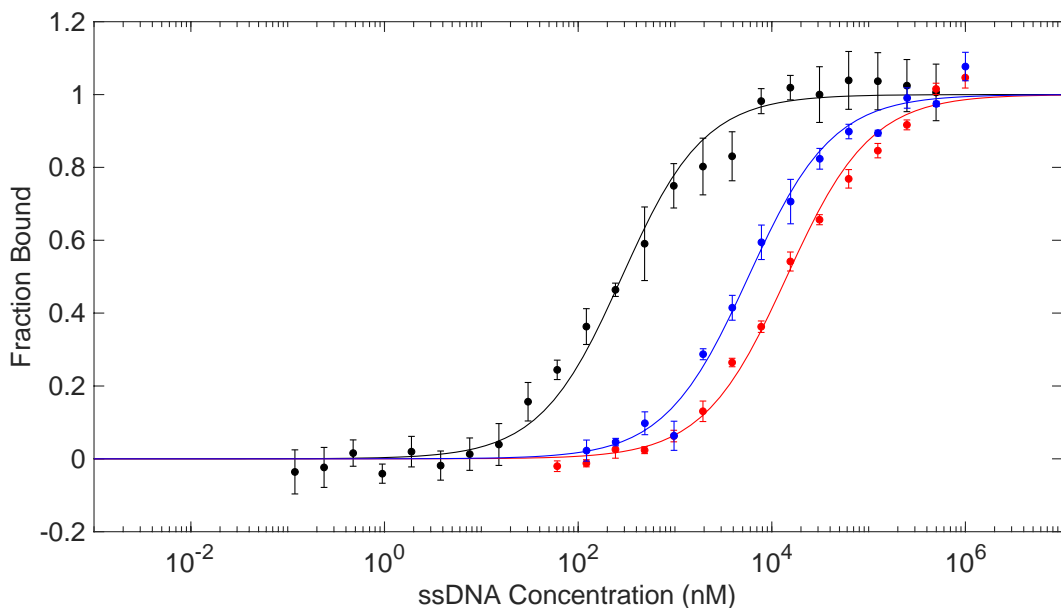

**Supplementary Figure 2a.** Micro Scale Thermophoresis binding data for 5'-AATCCdZAAA binding to active A3G-CTD2 (black), inactive A3G-CTD2\* (red), and 5'-AATCCCAA substrate binding to inactive A3G-CTD2\* (blue). Data are presented as mean values +/- SD. Source data are provided as a Source Data file. n=3 biologically independent samples.

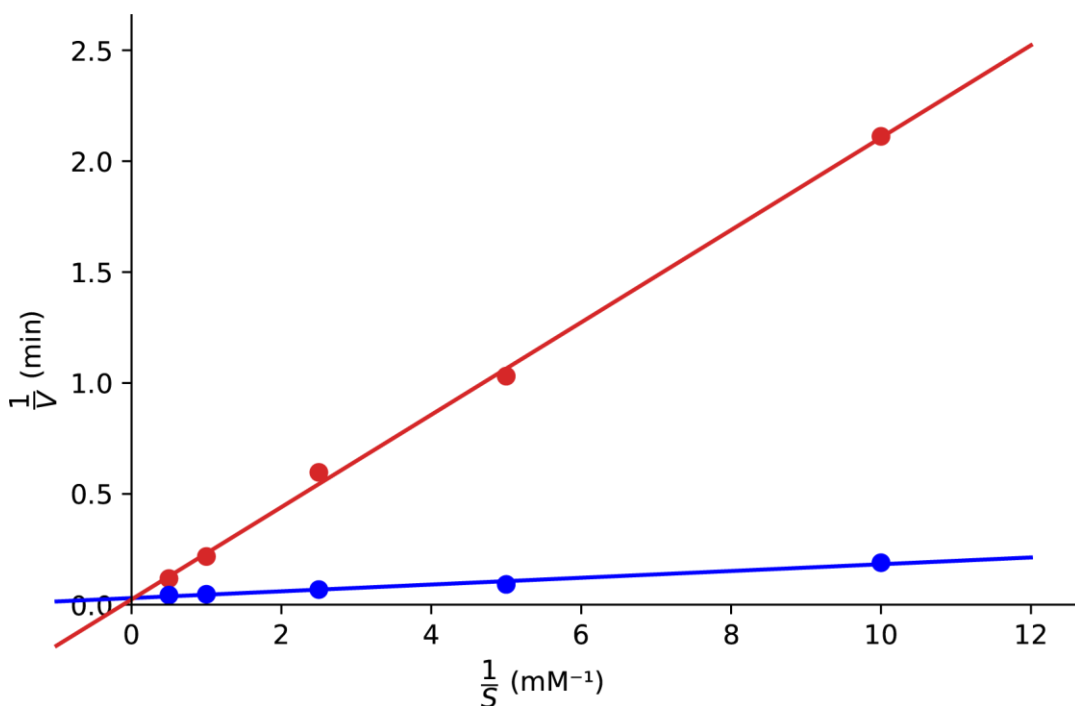

**Supplementary Figure 2b.** Lineweaver Burk plots of 200 nM A3G-CTD2 in the absence (blue) and presence (red) of 50  $\mu$ M 5'-AATCCdZAAA confirm competitive inhibition of A3G-CTD2 deaminase activity. Initial deamination rates were measured at 100  $\mu$ M, 200  $\mu$ M, 400  $\mu$ M, 1 mM, and 2 mM 5'-AATCCCAA substrate concentrations. Source data are provided as a Source Data file. n=3 biologically independent samples.

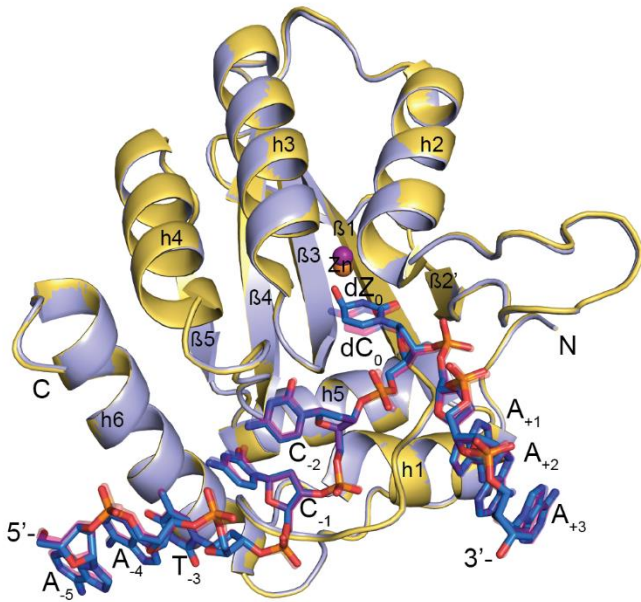

**Supplementary Figure 3.** Superposition of A3G-CTD2:dZ-ssDNA (PDB ID: 7UXD) structure with A3G-CTD2\*:ssDNA (PDB ID: 6BUX) structure. Protein structure represented as cartoon (A3G-CTD2 is yellow and A3G-CTD2\* is light blue) and ssDNA structure represented as sticks (dZ-ssDNA as blue and dC-ssDNA as transparent pink). Zn<sup>2+</sup> shown as a sphere (Orange in A3G-CTD2 and purple in A3G-CTD2\*). N and C indicate the N- and C-terminal ends of the protein, 5'- and 3'- indicates 5' and 3' ends of the ssDNA.

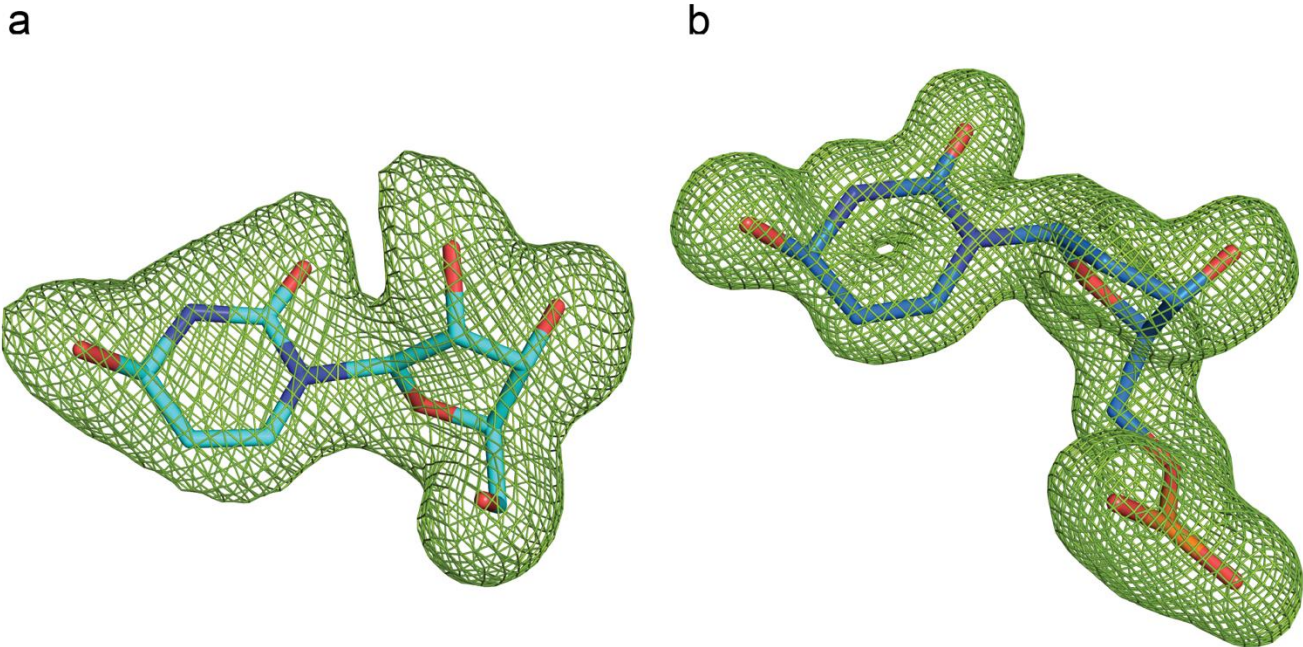

**Supplementary Figure 4.** Omit map for ligands. a) Omit (Fo–Fc) map contoured at  $3\sigma$  is shown in green around the ribo-zebularine hydrated intermediate (ZEB-OH) (PDB ID: 1CTU) b) Omit (Fo–Fc) map contoured at  $3\sigma$  is shown in green around the 2'-deoxy-zebularine hydrated intermediate (dZ-H<sub>2</sub>O) (PDB ID: 7UXD).

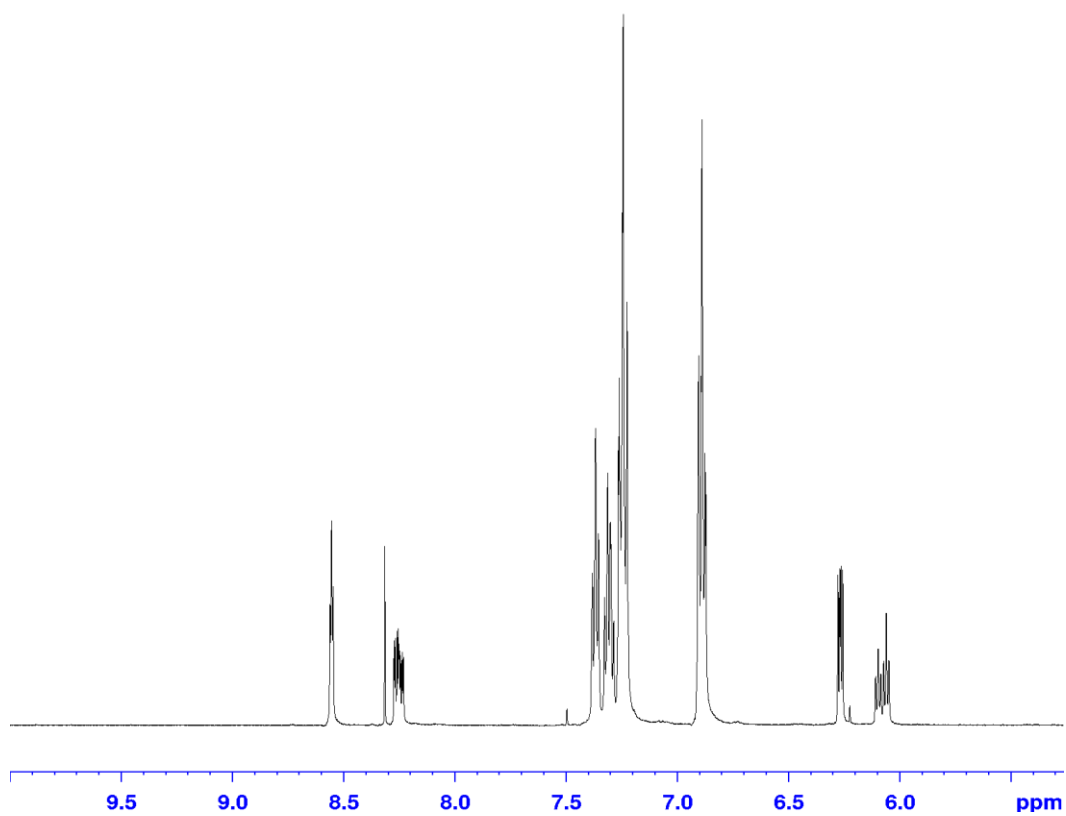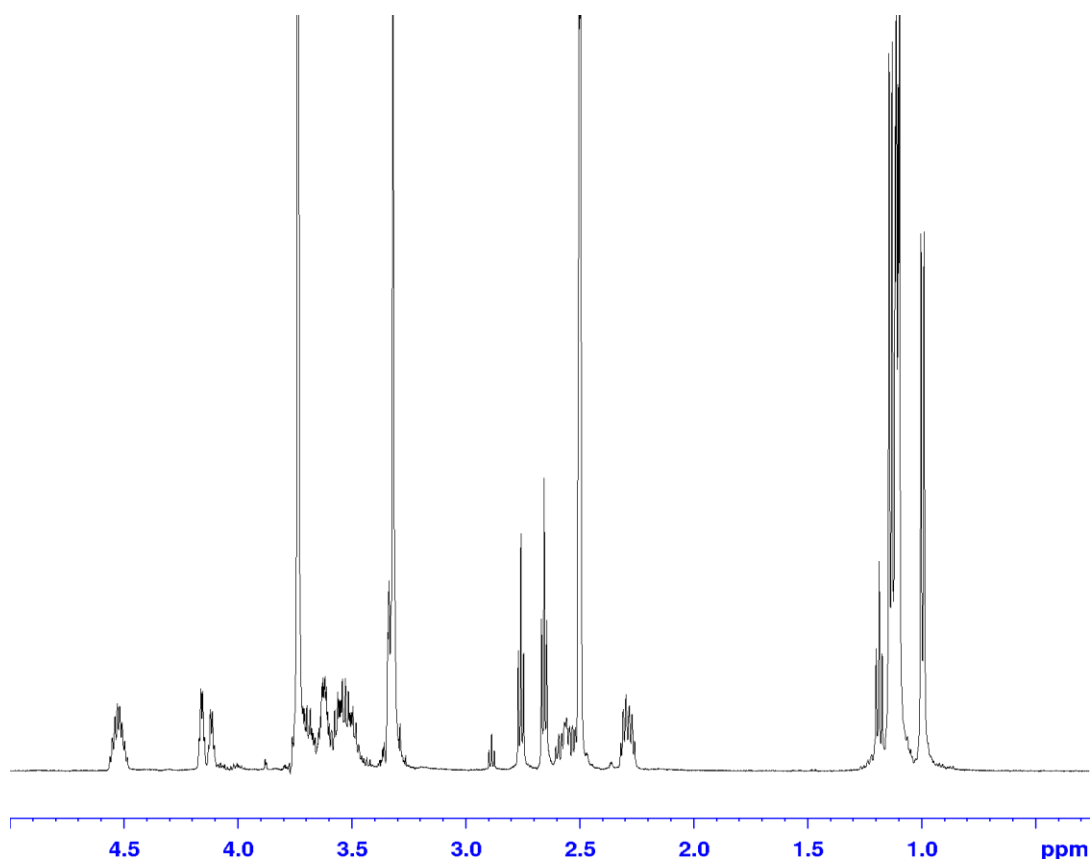

**Supplementary Figure 5.** <sup>1</sup>H NMR spectrum of final dZ phosphoramidite.

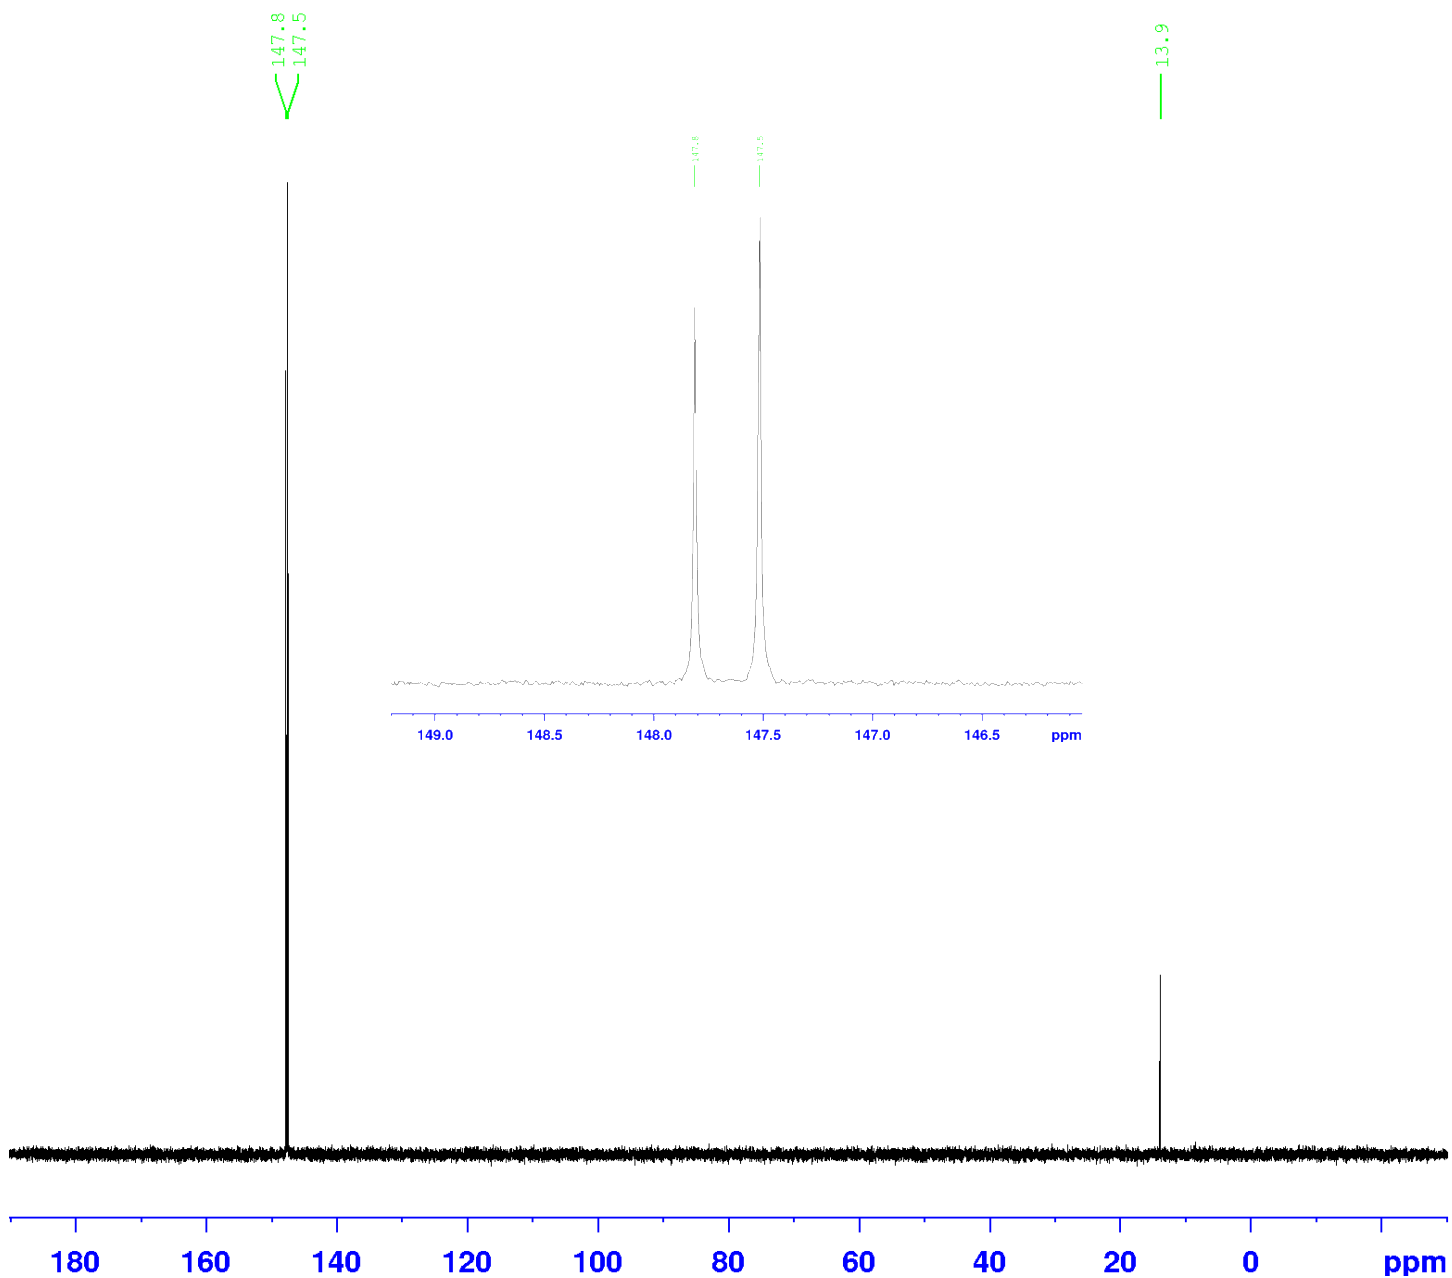

**Supplementary Figure 6.**  $^{31}\text{P}$  NMR spectrum of final dZ phosphoramidite (inset zoom of 146-149ppm).

20220722\_Hedger\_dZ\_phosphoramidite20 #20-92  
T: FTMS + p ESI Full ms [300.00-1200.00]

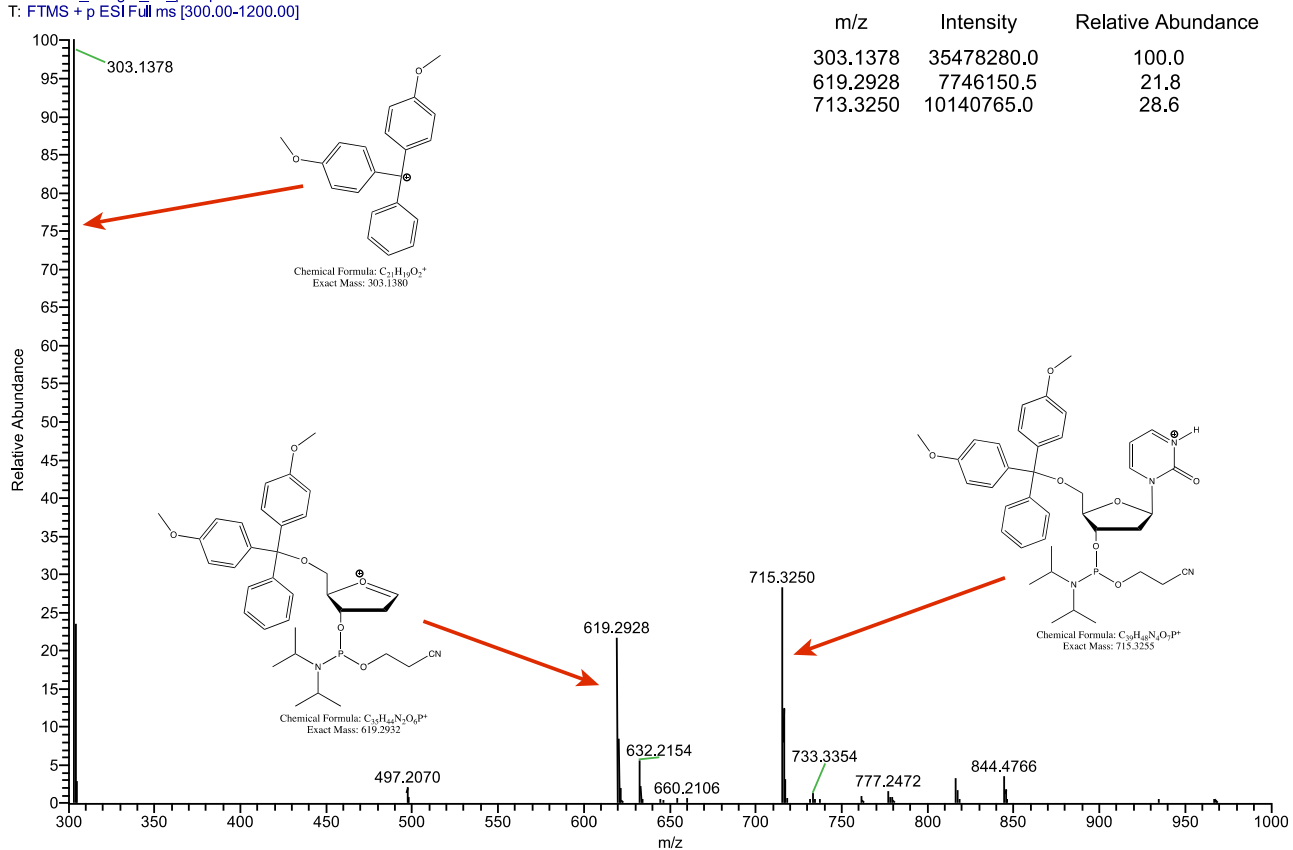

**Supplementary Figure 7.** HRMS ESI Mass spectrum of final dZ phosphoramidite. Spectrum also shows DMT+ cation and oxocarbenium cation fragments from the main compound.

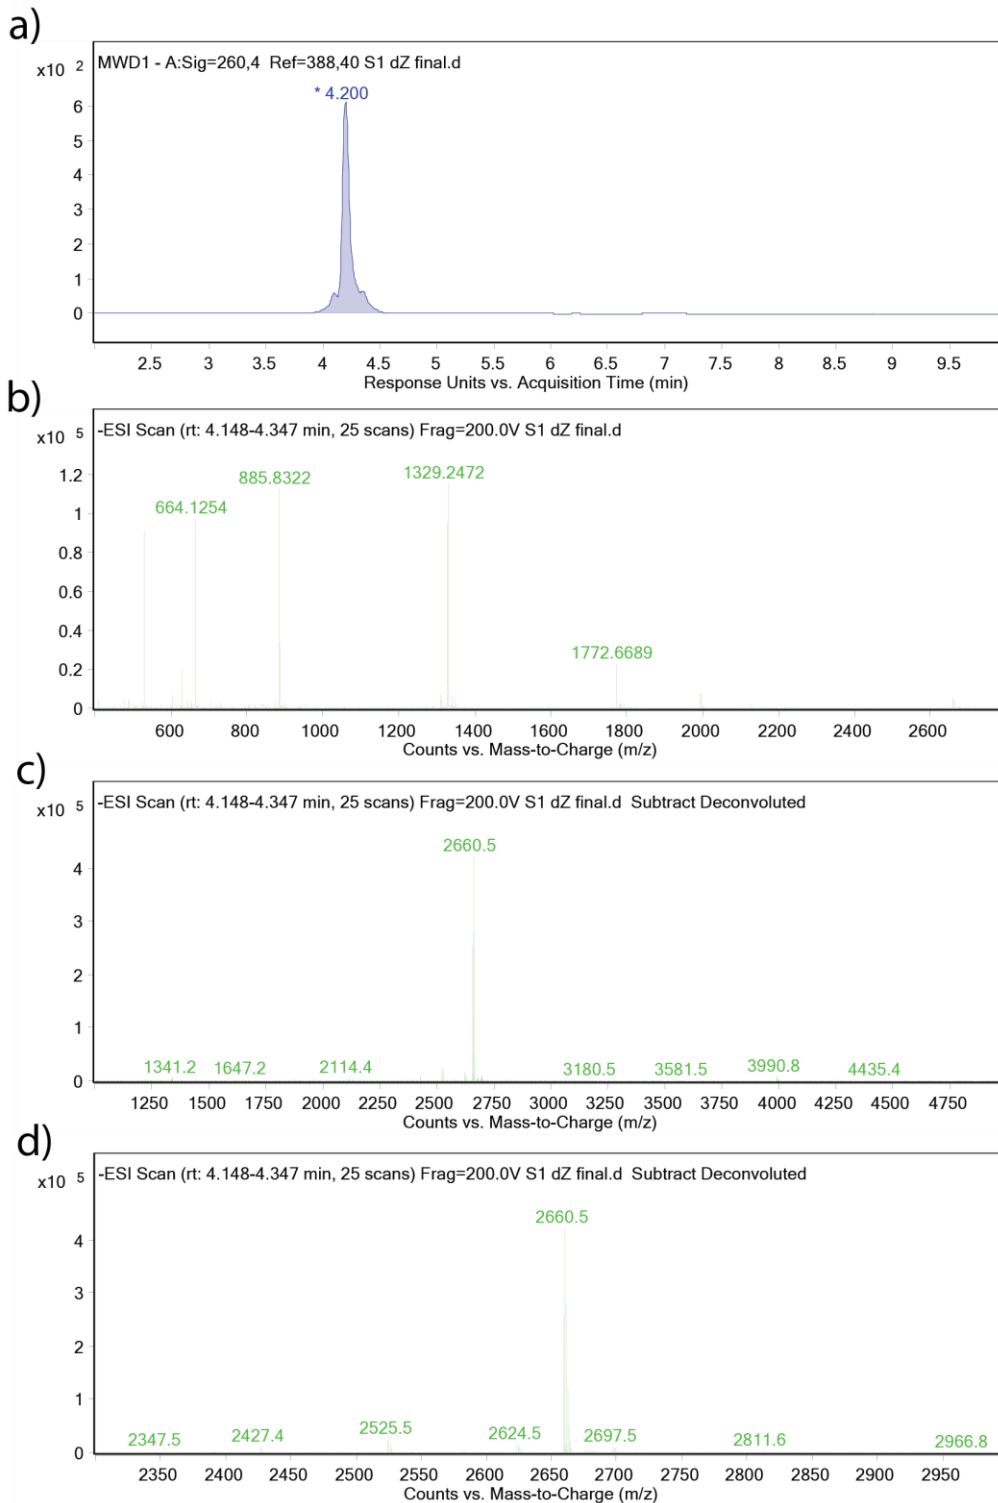

**Supplementary Figure 8.** Mass spectrometry analysis for dZ containing oligonucleotide (5'-AATCCdZAAA). a) LCMS UV trace at 260 nm. b) Mass spectrum showing multiply charged negative species c) Deconvoluted mass spectrum between 1000-5000 m/z showing the main oligonucleotide peak at 2660.5 d) Same as c, but expanded to focus on the region of 2300-3000 m/z.
